# Supplementary material for: Apoptin Gene Delivery by the Functionalized Polyamidoamine (PAMAM) Dendrimer Modified with Ornithine Induces Cell Death of HepG2 Cells
Source: MDPI journal article supplement (doi:10.3390/polym9060197), 2017-05-29
Supplement: s1 [file s1]

## Supporting information

### Supplementary Figures and Figure Legends.

Supplementary Figure S1. Overall synthesis scheme of PAMAM-O.

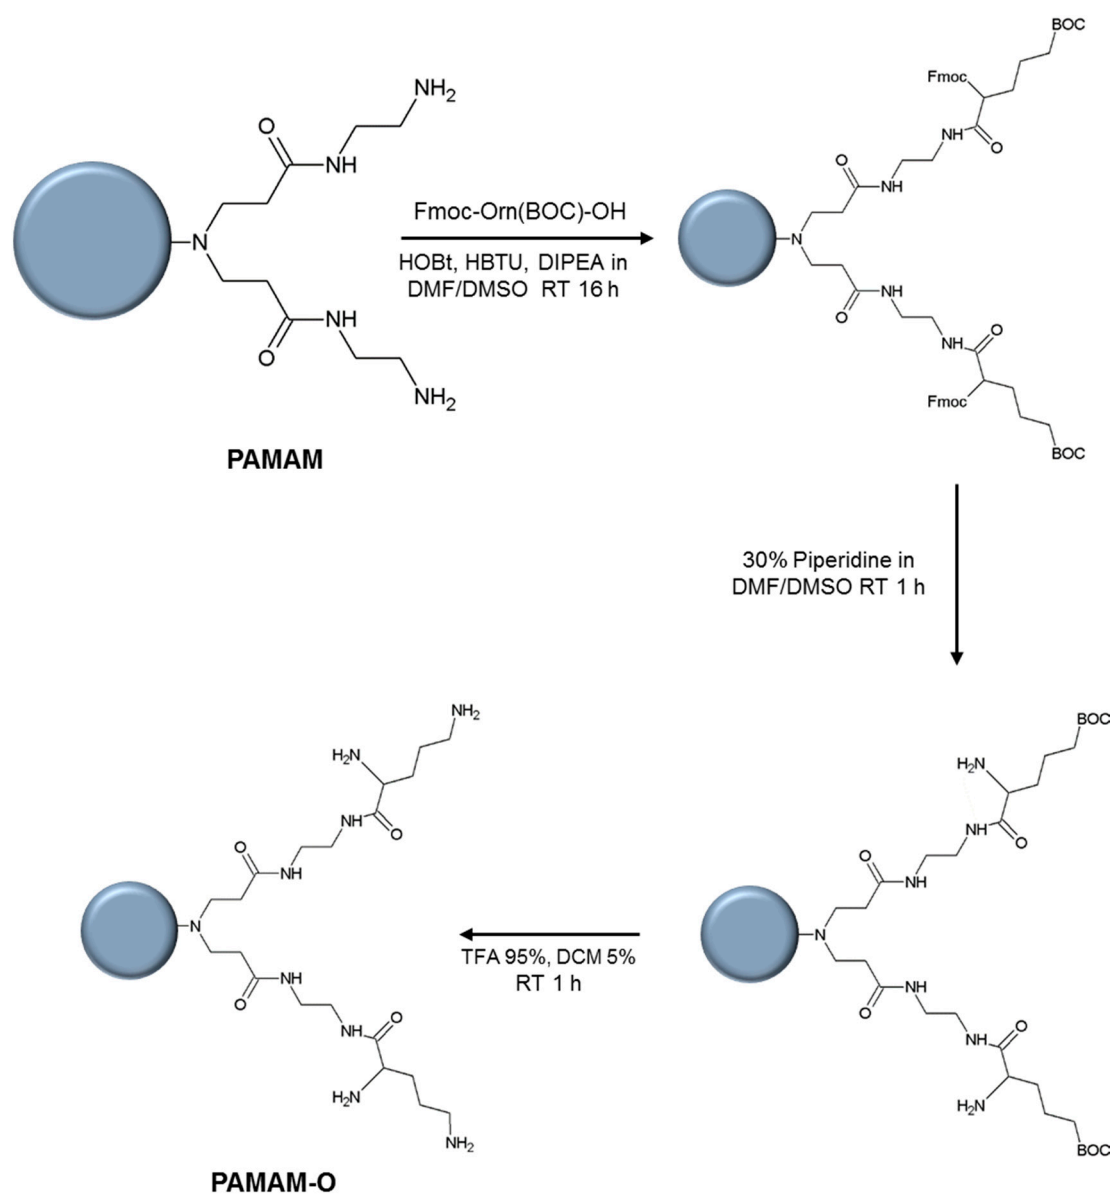

Supplementary Figure S2.  $^1\text{H}$ -nuclear magnetic resonance (NMR) spectroscopy of the PAMAM-O dendrimer. (A) PAMAM and (B) PAMAM-O.

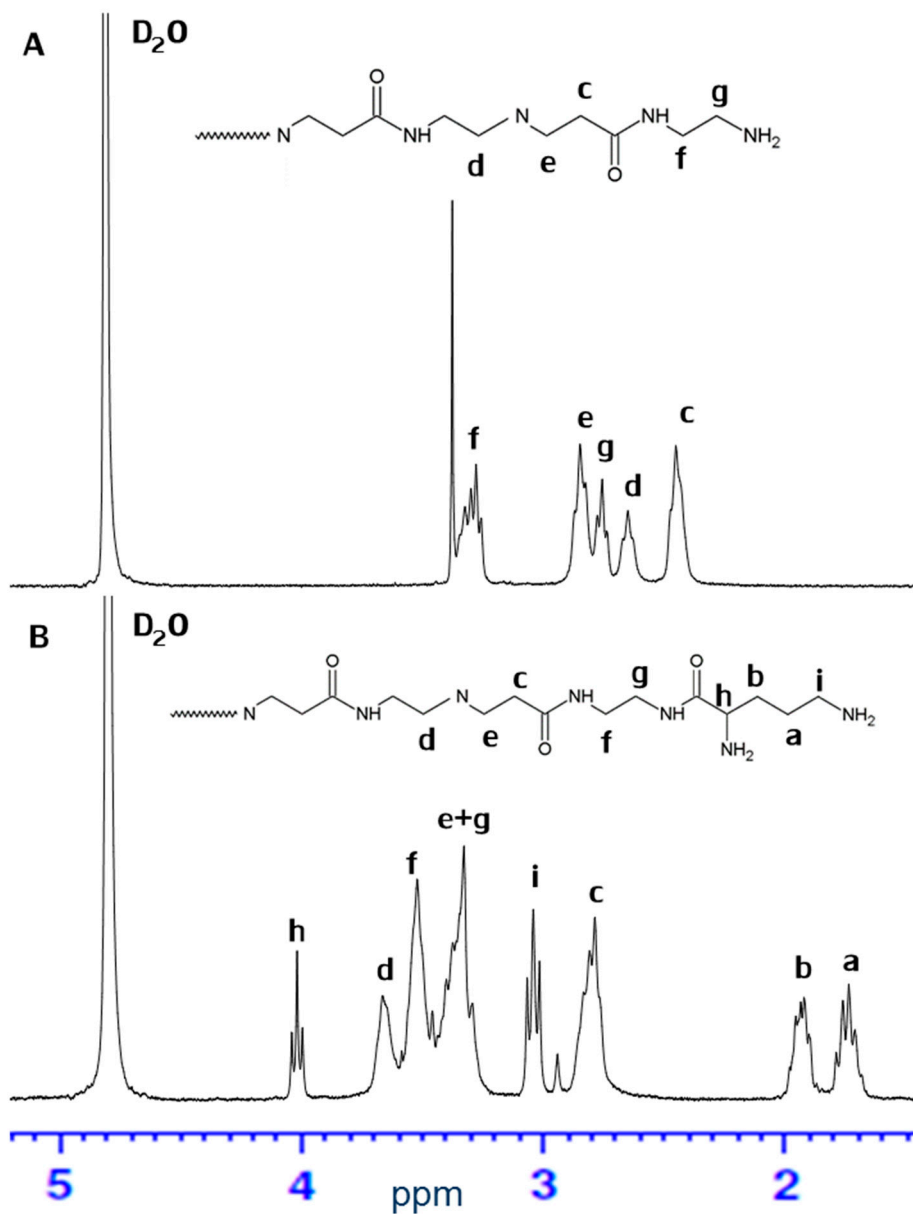

The  $^1\text{H}$  NMR (300 MHz,  $\text{D}_2\text{O}$ ) data of the polymers are as follows. (A) **PAMAM**:  $\delta$  (ppm) 2.44 (- $\text{NCH}_2\text{CH}_2\text{CO}$ - of PAMAM unit), 2.63 (- $\text{CONHCH}_2\text{CH}_2\text{N}$ - of PAMAM unit), 2.83 (- $\text{NCH}_2\text{CH}_2\text{CO}$ - of PAMAM unit), and 3.35 (- $\text{NCH}_2\text{CH}_2\text{CO}$  of PAMAM unit). (B) **PAMAM-O**:  $\delta$  (ppm) 1.73 (- $\text{HCCH}_2\text{CH}_2\text{CH}_2\text{NH}$ - of ornithine unit), 1.98 (- $\text{HCCCH}_2\text{CH}_2\text{CH}_2\text{NH}$ - of ornithine

unit), 2.81 (-NCH<sub>2</sub>**CH**<sub>2</sub>CO- of PAMAM unit), 3.06 (-HCCH<sub>2</sub>CH<sub>2</sub>**CH**<sub>2</sub>NH- of ornithine unit), 3.31 (-N**CH**<sub>2</sub>CH<sub>2</sub>CO- and -CONHCH<sub>2</sub>**CH**<sub>2</sub>- of PAMAM unit), 3.54 (-CONH**CH**<sub>2</sub>CH<sub>2</sub>- of PAMAM unit), 3.68 (-CONHCH<sub>2</sub>**CH**<sub>2</sub>N- of PAMAM unit), and 4.03 (-**HC**CH<sub>2</sub>CH<sub>2</sub>CH<sub>2</sub>NH- of ornithine unit). The conjugation yield (over 95%) was calculated from the result of <sup>1</sup>H NMR.
